# Supplementary material
Source: PubMed Central journal article supplement (PMC9211440)
Supplement: aac.00290-22-s0001.pdf [file aac.00290-22-s0001.pdf]

## Supplementary material

**Supplementary Table S1. Bacterial strains**

| Strain  | Genotype                                       | Selection    | Comment            |
|---------|------------------------------------------------|--------------|--------------------|
| DA5438  | <i>E. coli</i> K-12 MG1655                     | -            | -                  |
| DA63522 | <i>E. coli</i> K-12 MG1655/pUUH239.2           | -            | -                  |
| DA50494 | <i>E. coli</i> K-12 MG1655/pBAD18              | -            | -                  |
| DA50500 | <i>E. coli</i> K-12 MG1655/pBAD18:ctx-m-15     | -            | -                  |
| DA50506 | <i>E. coli</i> K-12 MG1655/pBAD18:tem-1        | -            | -                  |
| DA50512 | <i>E. coli</i> K-12 MG1655/pBAD18:oxa-1        | -            | -                  |
| DA61259 | <i>E. coli</i> K-12 MG1655/pUUH239.2 clone 1   | 1 mg/L CZA   | one step selection |
| DA61260 | <i>E. coli</i> K-12 MG1655/pUUH239.2 clone 2   | 1 mg/L CZA   | one step selection |
| DA61261 | <i>E. coli</i> K-12 MG1655/pUUH239.2 clone 3   | 1 mg/L CZA   | one step selection |
| DA61262 | <i>E. coli</i> K-12 MG1655/pUUH239.2 clone 4   | 1 mg/L CZA   | one step selection |
| DA62411 | <i>E. coli</i> K-12 MG1655/pUUH239.2 clone 5   | 1 mg/L CZA   | one step selection |
| DA61263 | <i>E. coli</i> K-12 MG1655/pUUH239.2 clone 1   | 64 mg/L SAM  | one step selection |
| DA61264 | <i>E. coli</i> K-12 MG1655/pUUH239.2 clone 2   | 64 mg/L SAM  | one step selection |
| DA61265 | <i>E. coli</i> K-12 MG1655/pUUH239.2 clone 3   | 64 mg/L SAM  | one step selection |
| DA61266 | <i>E. coli</i> K-12 MG1655/pUUH239.2 clone 4   | 64 mg/L SAM  | one step selection |
| DA61267 | <i>E. coli</i> K-12 MG1655/pUUH239.2 clone 5   | 64 mg/L SAM  | one step selection |
| DA61268 | <i>E. coli</i> K-12 MG1655/pUUH239.2 clone 1   | 16 mg/L TZP  | one step selection |
| DA61269 | <i>E. coli</i> K-12 MG1655/pUUH239.2 clone 2   | 16 mg/L TZP  | one step selection |
| DA61270 | <i>E. coli</i> K-12 MG1655/pUUH239.2 clone 3   | 16 mg/L TZP  | one step selection |
| DA61271 | <i>E. coli</i> K-12 MG1655/pUUH239.2 clone 4   | 16 mg/L TZP  | one step selection |
| DA61272 | <i>E. coli</i> K-12 MG1655/pUUH239.2 clone 5   | 16 mg/L TZP  | one step selection |
| DA65027 | <i>E. coli</i> K-12 MG1655/pUUH239.2 lineage 1 | 256 mg/L SAM | end population     |
| DA68745 | <i>E. coli</i> K-12 MG1655/pUUH239.2 lineage 2 | 64 mg/L SAM  | passage 3          |
| DA68746 | <i>E. coli</i> K-12 MG1655/pUUH239.2 lineage 2 | 128 mg/L SAM | passage 5          |
| DA68747 | <i>E. coli</i> K-12 MG1655/pUUH239.2 lineage 2 | 256 mg/L SAM | passage 7          |
| DA65028 | <i>E. coli</i> K-12 MG1655/pUUH239.2 lineage 2 | 256 mg/L SAM | end population     |
| DA65029 | <i>E. coli</i> K-12 MG1655/pUUH239.2 lineage 3 | 256 mg/L SAM | end population     |
| DA65030 | <i>E. coli</i> K-12 MG1655/pUUH239.2 lineage 4 | 256 mg/L SAM | end population     |
| DA68752 | <i>E. coli</i> K-12 MG1655/pUUH239.2 lineage 5 | 64 mg/L SAM  | passage 1          |
| DA68753 | <i>E. coli</i> K-12 MG1655/pUUH239.2 lineage 5 | 128 mg/L SAM | passage 4          |
| DA70068 | <i>E. coli</i> K-12 MG1655/pUUH239.2 lineage 5 | 128 mg/L SAM | passage 7          |
| DA65031 | <i>E. coli</i> K-12 MG1655/pUUH239.2 lineage 5 | 256 mg/L SAM | end population     |
| DA68754 | <i>E. coli</i> K-12 MG1655/pUUH239.2 lineage 6 | 64 mg/L SAM  | passage 1          |
| DA70069 | <i>E. coli</i> K-12 MG1655/pUUH239.2 lineage 6 | 64 mg/L SAM  | passage 5          |
| DA68755 | <i>E. coli</i> K-12 MG1655/pUUH239.2 lineage 6 | 128 mg/L SAM | passage 7          |
| DA65032 | <i>E. coli</i> K-12 MG1655/pUUH239.2 lineage 6 | 256 mg/L SAM | end population     |
| DA68781 | <i>E. coli</i> K-12 MG1655/pUUH239.2 lineage 1 | 32 mg/L TZP  | passage 1          |
| DA68782 | <i>E. coli</i> K-12 MG1655/pUUH239.2 lineage 1 | 64 mg/L TZP  | passage 2          |
| DA68783 | <i>E. coli</i> K-12 MG1655/pUUH239.2 lineage 1 | 128 mg/L TZP | passage 4          |
| DA65043 | <i>E. coli</i> K-12 MG1655/pUUH239.2 lineage 1 | 256 mg/L TZP | end population     |
| DA65044 | <i>E. coli</i> K-12 MG1655/pUUH239.2 lineage 2 | 256 mg/L TZP | end population     |
| DA65045 | <i>E. coli</i> K-12 MG1655/pUUH239.2 lineage 3 | 256 mg/L TZP | end population     |
| DA65046 | <i>E. coli</i> K-12 MG1655/pUUH239.2 lineage 4 | 256 mg/L TZP | end population     |
| DA68793 | <i>E. coli</i> K-12 MG1655/pUUH239.2 lineage 5 | 32 mg/L TZP  | passage 1          |
| DA68794 | <i>E. coli</i> K-12 MG1655/pUUH239.2 lineage 5 | 64 mg/L TZP  | passage 4          |
| DA68795 | <i>E. coli</i> K-12 MG1655/pUUH239.2 lineage 5 | 128 mg/L TZP | passage 6          |
| DA65047 | <i>E. coli</i> K-12 MG1655/pUUH239.2 lineage 5 | 256 mg/L TZP | end population     |
| DA68796 | <i>E. coli</i> K-12 MG1655/pUUH239.2 lineage 6 | 32 mg/L TZP  | passage 1          |
| DA68797 | <i>E. coli</i> K-12 MG1655/pUUH239.2 lineage 6 | 128 mg/L TZP | passage 4          |
| DA71947 | <i>E. coli</i> K-12 MG1655/pUUH239.2 lineage 6 | 128 mg/L TZP | passage 6          |
| DA65048 | <i>E. coli</i> K-12 MG1655/pUUH239.2 lineage 6 | 256 mg/L TZP | end population     |
| DA65159 | <i>E. coli</i> K-12 MG1655/pUUH239.2 lineage 1 | 64 mg/L CZA  | end population     |
| DA65160 | <i>E. coli</i> K-12 MG1655/pUUH239.2 lineage 2 | 32 mg/L CZA  | end population     |
| DA68621 | <i>E. coli</i> K-12 MG1655/pUUH239.2 lineage 3 | 0.5 mg/L CZA | passage 1          |
| DA68622 | <i>E. coli</i> K-12 MG1655/pUUH239.2 lineage 3 | 1 mg/L CZA   | passage 3          |
| DA68623 | <i>E. coli</i> K-12 MG1655/pUUH239.2 lineage 3 | 2 mg/L CZA   | passage 4          |
| DA68624 | <i>E. coli</i> K-12 MG1655/pUUH239.2 lineage 3 | 4 mg/L CZA   | passage 6          |
| DA68625 | <i>E. coli</i> K-12 MG1655/pUUH239.2 lineage 3 | 8 mg/L CZA   | passage 9          |
| DA68626 | <i>E. coli</i> K-12 MG1655/pUUH239.2 lineage 3 | 16 mg/L CZA  | passage 26         |
| DA68627 | <i>E. coli</i> K-12 MG1655/pUUH239.2 lineage 3 | 32 mg/L CZA  | passage 52         |
| DA65161 | <i>E. coli</i> K-12 MG1655/pUUH239.2 lineage 3 | 32 mg/L CZA  | end population     |
| DA65162 | <i>E. coli</i> K-12 MG1655/pUUH239.2 lineage 4 | 16 mg/L CZA  | end population     |
| DA68628 | <i>E. coli</i> K-12 MG1655/pUUH239.2 lineage 5 | 0.5 mg/L CZA | passage 1          |
| DA68629 | <i>E. coli</i> K-12 MG1655/pUUH239.2 lineage 5 | 1 mg/L CZA   | passage 3          |

|         |                                                |              |                |
|---------|------------------------------------------------|--------------|----------------|
| DA68630 | <i>E. coli</i> K-12 MG1655/pUUH239.2 lineage 5 | 2 mg/L CZA   | passage 4      |
| DA68034 | <i>E. coli</i> K-12 MG1655/pUUH239.2 lineage 5 | 4 mg/L CZA   | passage 6      |
| DA68035 | <i>E. coli</i> K-12 MG1655/pUUH239.2 lineage 5 | 8 mg/L CZA   | passage 9      |
| DA68036 | <i>E. coli</i> K-12 MG1655/pUUH239.2 lineage 5 | 16 mg/L CZA  | passage 24     |
| DA68037 | <i>E. coli</i> K-12 MG1655/pUUH239.2 lineage 5 | 32 mg/L CZA  | passage 50     |
| DA65163 | <i>E. coli</i> K-12 MG1655/pUUH239.2 lineage 5 | 32 mg/L CZA  | end population |
| DA68463 | <i>E. coli</i> K-12 MG1655/pUUH239.2 lineage 6 | 0.5 mg/L CZA | passage 1      |
| DA68464 | <i>E. coli</i> K-12 MG1655/pUUH239.2 lineage 6 | 2 mg/L CZA   | passage 3      |
| DA68038 | <i>E. coli</i> K-12 MG1655/pUUH239.2 lineage 6 | 4 mg/L CZA   | passage 5      |
| DA68465 | <i>E. coli</i> K-12 MG1655/pUUH239.2 lineage 6 | 8 mg/L CZA   | passage 13     |
| DA65164 | <i>E. coli</i> K-12 MG1655/pUUH239.2 lineage 6 | 8 mg/L CZA   | end population |
| DA65165 | <i>E. coli</i> K-12 MG1655/pUUH239.2 lineage 7 | 32 mg/L CZA  | end population |
| DA68466 | <i>E. coli</i> K-12 MG1655/pUUH239.2 lineage 8 | 0.5 mg/L CZA | passage 1      |
| DA68467 | <i>E. coli</i> K-12 MG1655/pUUH239.2 lineage 8 | 2 mg/L CZA   | passage 3      |
| DA68039 | <i>E. coli</i> K-12 MG1655/pUUH239.2 lineage 8 | 4 mg/L CZA   | passage 7      |
| DA68040 | <i>E. coli</i> K-12 MG1655/pUUH239.2 lineage 8 | 8 mg/L CZA   | passage 10     |
| DA68041 | <i>E. coli</i> K-12 MG1655/pUUH239.2 lineage 8 | 16 mg/L CZA  | passage 26     |
| DA68042 | <i>E. coli</i> K-12 MG1655/pUUH239.2 lineage 8 | 32 mg/L CZA  | passage 38     |
| DA68043 | <i>E. coli</i> K-12 MG1655/pUUH239.2 lineage 8 | 32 mg/L CZA  | passage 41     |
| DA65166 | <i>E. coli</i> K-12 MG1655/pUUH239.2 lineage 8 | 64 mg/L CZA  | end population |

**Supplementary Table S2.** Primers used to evaluate copy number of genes as well as junctions in the plasmid. F: forward primer and R: reverse primer.

| Application           | Sequence (5' → 3')                                      |
|-----------------------|---------------------------------------------------------|
| qPCR_ <i>hcaT</i>     | F: GCTGCTCGGCTTTCTCATCC<br>R: CCAACCACGCAGACCAACC       |
| qPCR_ <i>cysG</i>     | F: TTGTCCGGCGGTGGTGATGTC<br>R: ATGCGGTGAACTGTGGAATAAACG |
| qPCR_ <i>tem-1</i>    | F: CCAGAAACGCTGGTGAAAGT<br>R: TACCGCACCATAGCAGAA        |
| qPCR_ <i>ctx-m-15</i> | F: CAGCTGGTGACATGGATGAA<br>R: CTTAGGTTGAGGCTGGGTGA      |
| qPCR_ <i>oxa-1</i>    | F: GCAAATGGCACCAGATTCA<br>R: AATTGCATCCACGTCTTTGG       |
